# Supplementary material
Source: Springer Nature journal article supplement (https://www.springermedizin.de/resource/supplementary/12943_2009_565_MOESM8_ESM.pdf/9554982)

(A) RT-PCR for *BRCA2* and *ZAR2* mRNAs

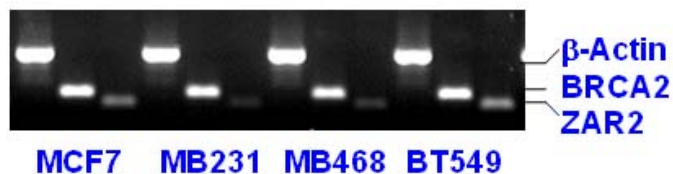

(B) Real-time RT-PCR

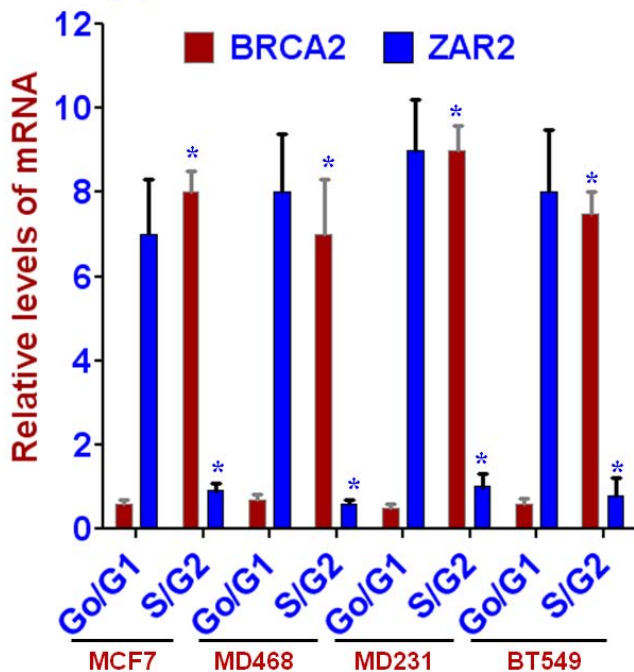

(C) Immunofluorescence confocal microscopy

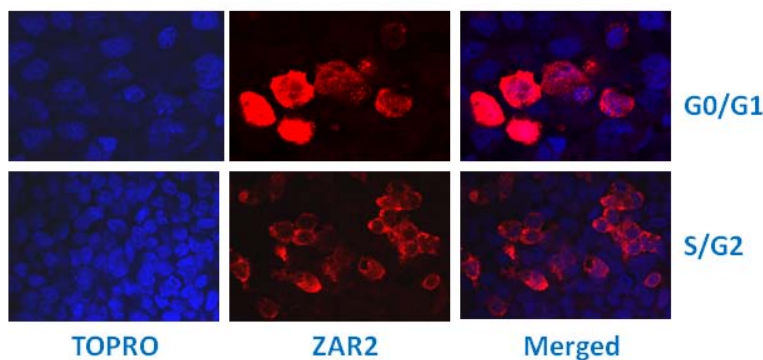

Supplement: MOESM8 [file 9554982]
